# Supplementary material
Source: HighWire-hosted journal article supplement (https://bmjopen.bmj.com/content/13/7/e067921)
Supplement: inline-supplementary-material-2 [file inline-supplementary-material-2.pdf]

**Risk of bias assessment for included studies using Cochrane Collaboration’s Tool.**

**1. Risk of bias assessment for MYRROR (2014)<sup>1</sup>**

| Bias                                        | Authors' judgement | Support for judgement                                                                                                                                                                                                                                                                                                                                                                         |
|---------------------------------------------|--------------------|-----------------------------------------------------------------------------------------------------------------------------------------------------------------------------------------------------------------------------------------------------------------------------------------------------------------------------------------------------------------------------------------------|
| Random sequence generation (selection bias) | Unclear risk       | Quote: "MYRROR was an international, phase III, multicenter, randomized, double-masked, sham-controlled study.<br><br>Eligible patients were randomized in a 3:1 ratio to receive intravitreal aflibercept or sham control (stratified by country). "<br><br>The trial was described as randomised, but the method of sequence generation was not specified, we assessed as "Unclear risk " . |
| Allocation concealment (selection bias)     | Unclear risk       | Not reported                                                                                                                                                                                                                                                                                                                                                                                  |
| Blinding of participants                    | Low risk           | Quote: "MYRROR was an                                                                                                                                                                                                                                                                                                                                                                         |

|                                                                       |          |                                                                                                                                                                                                                                                                                                                                                                                                                                                       |
|-----------------------------------------------------------------------|----------|-------------------------------------------------------------------------------------------------------------------------------------------------------------------------------------------------------------------------------------------------------------------------------------------------------------------------------------------------------------------------------------------------------------------------------------------------------|
| and personnel<br>(performance bias) All<br>outcomes                   |          | international, phase III,<br>multicenter, randomized,<br>double-masked, sham-controlled<br>study."                                                                                                                                                                                                                                                                                                                                                    |
| Blinding of outcome<br>assessment (detection<br>bias)<br>All outcomes | Low risk | Quote: "MYRROR was an<br>international, phase III,<br>multicenter, randomized,<br>double-masked, sham-controlled<br>study."                                                                                                                                                                                                                                                                                                                           |
| Incomplete outcome data<br>(attrition bias) All<br>outcomes           | Low risk | Quote: "In total, 122 patients were<br>randomized, of whom 91 received<br>intravitreal aflibercept 2.0 mg and<br>31 received sham; 122 patients<br>were included in the safety set. In<br>the full analysis set, 121 patients<br>were included (90 patients<br>received intravitreal aflibercept 2.0<br>mg and 31 received sham). "<br><br>Quote: "According to participant<br>flow data on ClinicalTrials.gov, 5<br>participants were withdrawn from |

|                                         |          |                                                                                                                                                                                                                            |
|-----------------------------------------|----------|----------------------------------------------------------------------------------------------------------------------------------------------------------------------------------------------------------------------------|
|                                         |          | the study and 1 participant did not complete visits to week 48 due to adverse events, both in the aflibercept group. However, only 1 participant failed to fulfil requirements of full analysis set after randomisation. " |
| Selective reporting<br>(reporting bias) | Low risk | All prespecified outcomes were reported.                                                                                                                                                                                   |
| Other bias                              | Low risk | No other bias identified.                                                                                                                                                                                                  |

1. Ikuno Y, Ohno-Matsui K, Wong TY, et al. Intravitreal Aflibercept Injection in Patients with Myopic Choroidal Neovascularization: The MYRROR Study. *Ophthalmology* 2015; 122:1220-7.

## 2. Risk of bias assessment for Parodi et al (2010)<sup>2</sup>

| Bias                                        | Authors' judgement | Support for judgement                                                                                              |
|---------------------------------------------|--------------------|--------------------------------------------------------------------------------------------------------------------|
| Random sequence generation (selection bias) | Low risk           | Quote: " Each patient was randomly allocated to 1 of the 3 treatment groups through a computer-generated number. " |
| Allocation concealment                      | Unclear risk       | Not reported                                                                                                       |

|                                                                        |              |                                                                                                                                                                                                                                                              |
|------------------------------------------------------------------------|--------------|--------------------------------------------------------------------------------------------------------------------------------------------------------------------------------------------------------------------------------------------------------------|
| (selection bias)                                                       |              |                                                                                                                                                                                                                                                              |
| Blinding of participants and personnel (performance bias) All outcomes | Unclear risk | Not reported                                                                                                                                                                                                                                                 |
| Blinding of outcome assessment (detection bias) All outcomes           | Low risk     | Quote: "At each scheduled examination, a complete ophthalmological assessment was carried out by an investigator who had had no previous contact with the subject and was unaware of the treatment previously administered. "                                |
| Incomplete outcome data (attrition bias) All outcomes                  | Low risk     | Quote: "Fifty-four patients affected by juxtafoveal CNV in pathologic myopia were recruited; 4 patients were excluded because they could not attend the scheduled examinations; 3 patients were not recruited because they were affected by media opacity. " |
| Selective reporting                                                    | Low risk     | All prespecified outcomes were                                                                                                                                                                                                                               |

|                  |          |                           |
|------------------|----------|---------------------------|
| (reporting bias) |          | reported.                 |
| Other bias       | Low risk | No other bias identified. |

2. Parodi MB, Iacono P, Papayannis A, et al. Laser photocoagulation, photodynamic therapy, and intravitreal bevacizumab for the treatment of juxtafoveal choroidal neovascularization secondary to pathologic myopia. *Arch Ophthalmol* 2010; 128:437-42.

### 3. Risk of bias assessment for Moreno et al (2013)<sup>3,4</sup>

| Bias                                        | Authors' judgement | Support for judgement                                                                                                                                                                                                                                                               |
|---------------------------------------------|--------------------|-------------------------------------------------------------------------------------------------------------------------------------------------------------------------------------------------------------------------------------------------------------------------------------|
| Random sequence generation (selection bias) | Low risk           | Quote: "The randomisation was done by the promotor and was provided by the IOBA."<br><br>Quote: "We performed a multicenter prospective study on 55 highly myopic eyes from 55 patients with CNV who were randomized to PDT (Group 1) or intravitreal bevacizumab (IVB) (Group 2)." |
| Allocation concealment (selection bias)     | Low risk           | Quote: "The randomisation was done by the promotor and was provided by the IOBA."                                                                                                                                                                                                   |

|                                                                        |           |                                                                                                                                                                                                                                                                                     |
|------------------------------------------------------------------------|-----------|-------------------------------------------------------------------------------------------------------------------------------------------------------------------------------------------------------------------------------------------------------------------------------------|
| Blinding of participants and personnel (performance bias) All outcomes | Low risk  | Quote: "The study was doubled masked: (the follow-up physician and the optometrist) and the patient were masked."                                                                                                                                                                   |
| Blinding of outcome assessment (detection bias) All outcomes           | Low risk  | Quote: "The study was doubled masked: (the follow-up physician and the optometrist) and the patient were masked."                                                                                                                                                                   |
| Incomplete outcome data (attrition bias) All outcomes                  | High risk | Quote: "Twenty-four eyes in group 1 (86%) and 25 eyes in group 2 (92.6%) completed 1 year of follow-up and 20 eyes in group 1 (71.4%) and 22 eyes in group 2 (78.6%) completed 2 years of follow-up."<br><br>The loss to follow-up was > 20% at 2 years and no reason was reported. |
| Selective reporting (reporting bias)                                   | Low risk  | All prespecified outcomes were reported.                                                                                                                                                                                                                                            |
| Other bias                                                             | Low risk  | No other bias identified.                                                                                                                                                                                                                                                           |

3. Ruiz-Moreno JM, López-Gálvez MI, Montero Moreno JA, et al. Intravitreal bevacizumab in

myopic neovascular membranes: 24-month results. *Ophthalmology* 2013; 120:1510-1.e1.

4. Zhu Y, Zhang T, Xu G, et al. Anti-vascular endothelial growth factor for choroidal neovascularisation in people with pathological myopia. *Cochrane Database Syst Rev* 2016; 12:CD011160.

4. Risk of bias assessment for RADIANCE (2014)<sup>5</sup>

| Bias                                        | Authors' judgement | Support for judgement                                                                                                                                                                                            |
|---------------------------------------------|--------------------|------------------------------------------------------------------------------------------------------------------------------------------------------------------------------------------------------------------|
| Random sequence generation (selection bias) | Low risk           | Quote: "A randomization list was produced by Novartis Drug Supply Management using a validated system that automates the random assignment of treatment groups to randomization numbers in the specified ratio." |
| Allocation concealment (selection bias)     | Low risk           | Quote: "At enrollment, patients received the lowest available randomization number that then assigned them in a 2:2:1 ratio to 1 of the 3 treatment groups."                                                     |
| Blinding of participants and personnel      | Low risk           | Quote: "Due to the different appearances and routes of                                                                                                                                                           |

|                                                                     |          |                                                                                                                                                                                                                                                                                                                                                                                                                                                                                                                  |
|---------------------------------------------------------------------|----------|------------------------------------------------------------------------------------------------------------------------------------------------------------------------------------------------------------------------------------------------------------------------------------------------------------------------------------------------------------------------------------------------------------------------------------------------------------------------------------------------------------------|
| (performance bias) All outcomes                                     |          | <p>administration between the 2 treatments, all patients received either sham injection or PDT sham in conjunction with the study treatment. The PDT sham consisted of intravenous injection of 5% dextrose solution followed by light application of PDT. "</p> <p>Quote: "The treating investigator was unmasked and administered the randomized study medication per the protocol; however, they were not involved in any other aspects of the study and could not communicate details of the treatment."</p> |
| Blinding of outcome assessment (detection bias)<br><br>All outcomes | Low risk | <p>Quote: "To ensure masking, 2 investigators were involved at each study center. All study assessments were made by the evaluating investigator, VA assessor, or other site personnel</p>                                                                                                                                                                                                                                                                                                                       |



|                                                       |          |                                                                                                                                                                                                                                                                                                                                           |
|-------------------------------------------------------|----------|-------------------------------------------------------------------------------------------------------------------------------------------------------------------------------------------------------------------------------------------------------------------------------------------------------------------------------------------|
|                                                       |          | who were masked to the treatment assignment. "                                                                                                                                                                                                                                                                                            |
| Incomplete outcome data (attrition bias) All outcomes | Low risk | Quote: "6(5.7%) patients discontinued from the study: 1(0.9%) unsatisfactory therapeutic effect; 1(0.9%) subject withdrew consent; 3(2.8%) lost to follow-up; 1(0.9%) protocol deviation.<br><br>4(3.4%) patients discontinued from the study: 2(1.7%) subject withdrew consent; 1(0.9%) lost to follow-up; 1(0.9%) protocol deviation. " |
| Selective reporting (reporting bias)                  | Low risk | All prespecified outcomes were reported.                                                                                                                                                                                                                                                                                                  |
| Other bias                                            | Low risk | No other bias identified.                                                                                                                                                                                                                                                                                                                 |

5. Wolf S, Balciuniene VJ, Laganovska G, et al. RADIANCE: a randomized controlled study of ranibizumab in patients with choroidal neovascularization secondary to pathologic myopia. *Ophthalmology* 2014; 121:682-92.e2.

5. Risk of bias assessment for BRILLIANCE (2019)<sup>6</sup>

| Bias                                                          | Authors' judgement | Support for judgement                                                                                                                                                                                                                                                                                       |
|---------------------------------------------------------------|--------------------|-------------------------------------------------------------------------------------------------------------------------------------------------------------------------------------------------------------------------------------------------------------------------------------------------------------|
| Random sequence generation (selection bias)                   | Low risk           | Quote: "Eligible patients were randomized 2:2:1 to one of three treatment arms using an interactive response technology system (see Figure, Supplemental Digital Content 3, <a href="http://links.lww.com/IAE/A901">http://links.lww.com/IAE/A901</a> , which shows treatment schedule and study design)."  |
| Allocation concealment (selection bias)                       | Low risk           | Quote: "Eligible patients were randomized 2:2:1 to one of three treatment arms using an interactive response technology system (see Figure, Supplemental Digital Content 3, <a href="http://links.lww.com/IAE/A901">http://links.lww.com/IAE/A901</a> , which shows treatment schedule and study design). " |
| Blinding of participants and personnel (performance bias) All | Low risk           | Quote: "BRILLIANCE was a 12-month, Phase III, randomized, double-masked, multicenter,                                                                                                                                                                                                                       |

|                                                                            |          |                                                                                                                                                                                                                                                                                                                                |
|----------------------------------------------------------------------------|----------|--------------------------------------------------------------------------------------------------------------------------------------------------------------------------------------------------------------------------------------------------------------------------------------------------------------------------------|
| outcomes                                                                   |          | <p>active-controlled clinical trial."</p> <p>Quote: "For masking purpose, sham ranibizumab or sham vPDT was applied."</p> <p>Quote: "All patients were masked to the study treatment."</p>                                                                                                                                     |
| <p>Blinding of outcome assessment (detection bias)</p> <p>All outcomes</p> | Low risk | <p>Quote: "In addition, to fulfill the masking, there were at least two investigators involved into the study: masked (assessing) investigator performing all assessments and capturing data; and an unmasked (treating) investigator administering the randomized study treatment when needed according to the protocol."</p> |
| <p>Incomplete outcome data (attrition bias) All outcomes</p>               | Low risk | <p>Quote: "9(4.9%) patients discontinued from the study in group 1: 1(0.5%) adverse event; 7(3.8%) subject withdrew consent; 1(0.5%) lost to follow-up."</p> <p>Quote: "9(4.9%) patients</p>                                                                                                                                   |

|                                             |          |                                                                                                                                                                                                                                                                                                           |
|---------------------------------------------|----------|-----------------------------------------------------------------------------------------------------------------------------------------------------------------------------------------------------------------------------------------------------------------------------------------------------------|
|                                             |          | discontinued from the study in group 2: 2(1.1%) adverse event; 3(1.6%) subject withdrew consent; 2(1.1%) administrative problems; 2(1.1%) physician’s decision."<br><br>Quote: "8(8.8%) patients discontinued from the study in group 3: 7(7.7%) subject withdrew consent; 1(1.1%) physician’s decision." |
| Selective reporting<br><br>(reporting bias) | Low risk | All prespecified outcomes were reported.                                                                                                                                                                                                                                                                  |
| Other bias                                  | Low risk | No other bias identified.                                                                                                                                                                                                                                                                                 |

6. Chen Y, Sharma T, Li X, et al. Ranibizumab versus verteporfin photodynamic therapy in Asian patients with myopic choroidal neovascularization: BRILLIANCE, a 12-month, randomized, double-masked study. *Retina* 2019; 39:1985-1994.

6. Risk of bias assessment for Saviano et al (2013)<sup>7</sup>

| Bias                                        | Authors' judgement | Support for judgement                                                                          |
|---------------------------------------------|--------------------|------------------------------------------------------------------------------------------------|
| Random sequence generation (selection bias) | Unclear risk       | Quote: "Thirty-four patients were included in the study and then randomized into two different |

|                                                                           |              |                                                                                                                                                                  |
|---------------------------------------------------------------------------|--------------|------------------------------------------------------------------------------------------------------------------------------------------------------------------|
|                                                                           |              | <p>treatment groups."</p> <p>The trial was described as randomised, but the method of sequence generation was not specified, we assessed as "Unclear risk" .</p> |
| Allocation concealment<br>(selection bias)                                | Unclear risk | Not reported                                                                                                                                                     |
| Blinding of participants and personnel<br>(performance bias) All outcomes | Unclear risk | Not reported                                                                                                                                                     |
| Blinding of outcome assessment (detection bias)<br>All outcomes           | Unclear risk | Not reported                                                                                                                                                     |
| Incomplete outcome data<br>(attrition bias) All outcomes                  | Low risk     | No loss to follow-up.                                                                                                                                            |
| Selective reporting<br>(reporting bias)                                   | Low risk     | All prespecified outcomes were reported.                                                                                                                         |
| Other bias                                                                | Low risk     | No other bias identified.                                                                                                                                        |

7. Saviano S, Piermarocchi R, Leon PE, et al. Combined therapy with bevacizumab and photodynamic therapy for myopic choroidal neovascularization: A one-year follow-up controlled study. *Int J Ophthalmol* 2014; 7:335-9.

7. Risk of bias assessment for Rinaldi et al (2016)<sup>8</sup>

| Bias                                                                   | Authors' judgement | Support for judgement                                                                                                          |
|------------------------------------------------------------------------|--------------------|--------------------------------------------------------------------------------------------------------------------------------|
| Random sequence generation (selection bias)                            | Low risk           | Quote: "Randomization was performed using computer-generated random numbers: each number corresponded to a type of treatment." |
| Allocation concealment (selection bias)                                | Low risk           | Quote: "Randomization was performed using computer-generated random numbers: each number corresponded to a type of treatment." |
| Blinding of participants and personnel (performance bias) All outcomes | High risk          | Quote: "The study was a prospective, comparative, interventional, randomized, openlabel clinical trial."                       |

|                                                                 |           |                                                                                                          |
|-----------------------------------------------------------------|-----------|----------------------------------------------------------------------------------------------------------|
| Blinding of outcome assessment (detection bias)<br>All outcomes | High risk | Quote: "The study was a prospective, comparative, interventional, randomized, openlabel clinical trial." |
| Incomplete outcome data (attrition bias) All outcomes           | Low risk  | Quote: "All patients completed the follow-up at 48 weeks."                                               |
| Selective reporting (reporting bias)                            | Low risk  | All prespecified outcomes were reported.                                                                 |
| Other bias                                                      | Low risk  | No other bias identified.                                                                                |

8. Rinaldi M, Semeraro F, Chiosi F, et al. Reduced-fluence verteporfin photodynamic therapy plus ranibizumab for choroidal neovascularization in pathologic myopia. *Graefes Arch Clin Exp Ophthalmol* 2017; 255:529-539.

2. Risk of bias summary for included RCTs.

|                 | Random sequence generation (selection bias) | Allocation concealment (selection bias) | Blinding of participants and personnel (performance bias) | Blinding of outcome assessment (detection bias) | Incomplete outcome data (attrition bias) | Selective reporting (reporting bias) | Other bias |
|-----------------|---------------------------------------------|-----------------------------------------|-----------------------------------------------------------|-------------------------------------------------|------------------------------------------|--------------------------------------|------------|
| BRILLIANCE 2019 | +                                           | +                                       | +                                                         | +                                               | +                                        | +                                    | +          |
| Moreno 2013     | +                                           | +                                       | +                                                         | +                                               | -                                        | +                                    | +          |
| MYRROR 2014     | ?                                           | ?                                       | +                                                         | +                                               | +                                        | +                                    | +          |
| Parodi 2010     | +                                           | ?                                       | ?                                                         | +                                               | +                                        | +                                    | +          |
| RADANCE 2014    | +                                           | +                                       | +                                                         | +                                               | +                                        | +                                    | +          |
| Rinaldi 2016    | +                                           | +                                       | -                                                         | -                                               | +                                        | +                                    | +          |
| Saviano 2013    | ?                                           | ?                                       | ?                                                         | ?                                               | +                                        | +                                    | +          |
